# Supplementary material
Source: publisher figshare collection journal article supplement (https://tandf.figshare.com/articles/dataset/_/11309213)

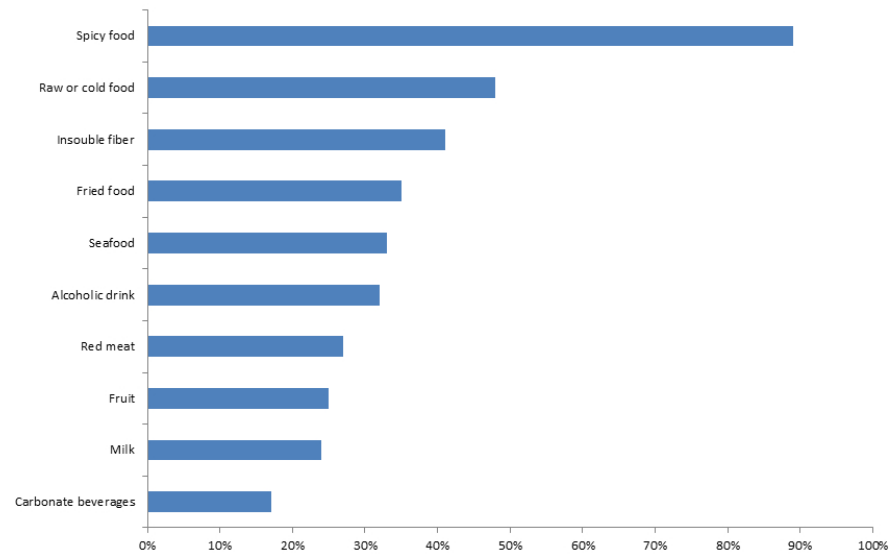

254x190mm (96 x 96 DPI)

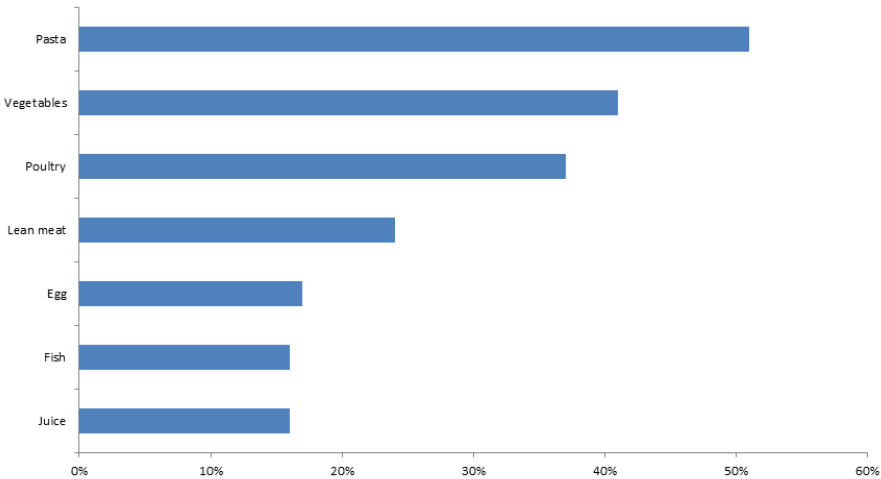

254x190mm (96 x 96 DPI)

Supplement: Supplementary file 1 [file 1]
